# Supplementary material for: An EQ-5D-5L value set based on Uruguayan population preferences
Source: Springer Nature journal article supplement (doi:10.1007/s11136-015-1086-4), 2015-08-04
Supplement: MOESM1 [file 793486]

Table 1: Uruguayan EQ-5D-5L Value Set

| **Health  state** | **Value** | **Health  state** | **Value** | **Health  state** | **Value** | **Health  state** | **Value** | **Health  state** | **Value** | **Health  state** | **Value** | **Health  state** | **Value** |
| --- | --- | --- | --- | --- | --- | --- | --- | --- | --- | --- | --- | --- | --- |
| 11111 | 1.000 | 11331 | 0.881 | 11551 | 0.485 | 12321 | 0.899 | 12541 | 0.543 | 13311 | 0.881 | 13531 | 0.634 |
| 11112 | 0.978 | 11332 | 0.872 | 11552 | 0.476 | 12322 | 0.890 | 12542 | 0.534 | 13312 | 0.872 | 13532 | 0.625 |
| 11113 | 0.944 | 11333 | 0.838 | 11553 | 0.442 | 12323 | 0.856 | 12543 | 0.500 | 13313 | 0.837 | 13533 | 0.591 |
| 11114 | 0.883 | 11334 | 0.777 | 11554 | 0.381 | 12324 | 0.795 | 12544 | 0.439 | 13314 | 0.777 | 13534 | 0.530 |
| 11115 | 0.810 | 11335 | 0.704 | 11555 | 0.308 | 12325 | 0.722 | 12545 | 0.366 | 13315 | 0.704 | 13535 | 0.457 |
| 11121 | 0.970 | 11341 | 0.755 | 12111 | 0.962 | 12331 | 0.856 | 12551 | 0.460 | 13321 | 0.864 | 13541 | 0.508 |
| 11122 | 0.961 | 11342 | 0.745 | 12112 | 0.952 | 12332 | 0.846 | 12552 | 0.450 | 13322 | 0.854 | 13542 | 0.499 |
| 11123 | 0.927 | 11343 | 0.711 | 12113 | 0.918 | 12333 | 0.812 | 12553 | 0.416 | 13323 | 0.820 | 13543 | 0.464 |
| 11124 | 0.866 | 11344 | 0.651 | 12114 | 0.858 | 12334 | 0.751 | 12554 | 0.356 | 13324 | 0.760 | 13544 | 0.404 |
| 11125 | 0.793 | 11345 | 0.578 | 12115 | 0.785 | 12335 | 0.679 | 12555 | 0.283 | 13325 | 0.687 | 13545 | 0.331 |
| 11131 | 0.927 | 11351 | 0.671 | 12121 | 0.945 | 12341 | 0.729 | 13111 | 0.927 | 13331 | 0.820 | 13551 | 0.425 |
| 11132 | 0.917 | 11352 | 0.662 | 12122 | 0.935 | 12342 | 0.720 | 13112 | 0.917 | 13332 | 0.811 | 13552 | 0.415 |
| 11133 | 0.883 | 11353 | 0.628 | 12123 | 0.901 | 12343 | 0.686 | 13113 | 0.883 | 13333 | 0.777 | 13553 | 0.381 |
| 11134 | 0.822 | 11354 | 0.567 | 12124 | 0.840 | 12344 | 0.625 | 13114 | 0.822 | 13334 | 0.716 | 13554 | 0.320 |
| 11135 | 0.750 | 11355 | 0.494 | 12125 | 0.768 | 12345 | 0.552 | 13115 | 0.749 | 13335 | 0.643 | 13555 | 0.247 |
| 11141 | 0.800 | 11411 | 0.869 | 12131 | 0.901 | 12351 | 0.646 | 13121 | 0.909 | 13341 | 0.694 | 14111 | 0.871 |
| 11142 | 0.791 | 11412 | 0.860 | 12132 | 0.892 | 12352 | 0.636 | 13122 | 0.900 | 13342 | 0.684 | 14112 | 0.861 |
| 11143 | 0.757 | 11413 | 0.826 | 12133 | 0.858 | 12353 | 0.602 | 13123 | 0.866 | 13343 | 0.650 | 14113 | 0.827 |
| 11144 | 0.696 | 11414 | 0.765 | 12134 | 0.797 | 12354 | 0.542 | 13124 | 0.805 | 13344 | 0.590 | 14114 | 0.766 |
| 11145 | 0.623 | 11415 | 0.692 | 12135 | 0.724 | 12355 | 0.469 | 13125 | 0.732 | 13345 | 0.517 | 14115 | 0.693 |
| 11151 | 0.717 | 11421 | 0.852 | 12141 | 0.775 | 12411 | 0.844 | 13131 | 0.866 | 13351 | 0.611 | 14121 | 0.853 |
| 11152 | 0.707 | 11422 | 0.843 | 12142 | 0.765 | 12412 | 0.834 | 13132 | 0.856 | 13352 | 0.601 | 14122 | 0.844 |
| 11153 | 0.673 | 11423 | 0.809 | 12143 | 0.731 | 12413 | 0.800 | 13133 | 0.822 | 13353 | 0.567 | 14123 | 0.810 |
| 11154 | 0.613 | 11424 | 0.748 | 12144 | 0.671 | 12414 | 0.739 | 13134 | 0.762 | 13354 | 0.506 | 14124 | 0.749 |
| 11155 | 0.540 | 11425 | 0.675 | 12145 | 0.598 | 12415 | 0.667 | 13135 | 0.689 | 13355 | 0.433 | 14125 | 0.676 |
| 11211 | 0.945 | 11431 | 0.808 | 12151 | 0.691 | 12421 | 0.826 | 13141 | 0.739 | 13411 | 0.808 | 14131 | 0.810 |
| 11212 | 0.936 | 11432 | 0.799 | 12152 | 0.682 | 12422 | 0.817 | 13142 | 0.730 | 13412 | 0.799 | 14132 | 0.800 |
| 11213 | 0.901 | 11433 | 0.765 | 12153 | 0.648 | 12423 | 0.783 | 13143 | 0.696 | 13413 | 0.765 | 14133 | 0.766 |
| 11214 | 0.841 | 11434 | 0.704 | 12154 | 0.587 | 12424 | 0.722 | 13144 | 0.635 | 13414 | 0.704 | 14134 | 0.706 |
| 11215 | 0.768 | 11435 | 0.631 | 12155 | 0.514 | 12425 | 0.649 | 13145 | 0.562 | 13415 | 0.631 | 14135 | 0.633 |
| 11221 | 0.928 | 11441 | 0.682 | 12211 | 0.919 | 12431 | 0.783 | 13151 | 0.656 | 13421 | 0.791 | 14141 | 0.683 |
| 11222 | 0.918 | 11442 | 0.673 | 12212 | 0.910 | 12432 | 0.773 | 13152 | 0.647 | 13422 | 0.782 | 14142 | 0.674 |
| 11223 | 0.884 | 11443 | 0.639 | 12213 | 0.876 | 12433 | 0.739 | 13153 | 0.612 | 13423 | 0.748 | 14143 | 0.640 |
| 11224 | 0.824 | 11444 | 0.578 | 12214 | 0.815 | 12434 | 0.679 | 13154 | 0.552 | 13424 | 0.687 | 14144 | 0.579 |
| 11225 | 0.751 | 11445 | 0.505 | 12215 | 0.742 | 12435 | 0.606 | 13155 | 0.479 | 13425 | 0.614 | 14145 | 0.506 |
| 11231 | 0.884 | 11451 | 0.599 | 12221 | 0.902 | 12441 | 0.657 | 13211 | 0.884 | 13431 | 0.748 | 14151 | 0.600 |
| 11232 | 0.875 | 11452 | 0.589 | 12222 | 0.893 | 12442 | 0.647 | 13212 | 0.875 | 13432 | 0.738 | 14152 | 0.591 |
| 11233 | 0.841 | 11453 | 0.555 | 12223 | 0.859 | 12443 | 0.613 | 13213 | 0.841 | 13433 | 0.704 | 14153 | 0.556 |
| 11234 | 0.780 | 11454 | 0.494 | 12224 | 0.798 | 12444 | 0.552 | 13214 | 0.780 | 13434 | 0.643 | 14154 | 0.496 |
| 11235 | 0.707 | 11455 | 0.422 | 12225 | 0.725 | 12445 | 0.479 | 13215 | 0.707 | 13435 | 0.570 | 14155 | 0.423 |
| 11241 | 0.758 | 11511 | 0.756 | 12231 | 0.859 | 12451 | 0.573 | 13221 | 0.867 | 13441 | 0.621 | 14211 | 0.828 |
| 11242 | 0.748 | 11512 | 0.746 | 12232 | 0.849 | 12452 | 0.564 | 13222 | 0.858 | 13442 | 0.612 | 14212 | 0.819 |
| 11243 | 0.714 | 11513 | 0.712 | 12233 | 0.815 | 12453 | 0.530 | 13223 | 0.823 | 13443 | 0.578 | 14213 | 0.785 |
| 11244 | 0.654 | 11514 | 0.652 | 12234 | 0.754 | 12454 | 0.469 | 13224 | 0.763 | 13444 | 0.517 | 14214 | 0.724 |
| 11245 | 0.581 | 11515 | 0.579 | 12235 | 0.682 | 12455 | 0.396 | 13225 | 0.690 | 13445 | 0.444 | 14215 | 0.651 |
| 11251 | 0.675 | 11521 | 0.739 | 12241 | 0.732 | 12511 | 0.730 | 13231 | 0.823 | 13451 | 0.538 | 14221 | 0.811 |
| 11252 | 0.665 | 11522 | 0.729 | 12242 | 0.723 | 12512 | 0.721 | 13232 | 0.814 | 13452 | 0.528 | 14222 | 0.802 |
| 11253 | 0.631 | 11523 | 0.695 | 12243 | 0.689 | 12513 | 0.687 | 13233 | 0.780 | 13453 | 0.494 | 14223 | 0.767 |
| 11254 | 0.570 | 11524 | 0.635 | 12244 | 0.628 | 12514 | 0.626 | 13234 | 0.719 | 13454 | 0.434 | 14224 | 0.707 |
| 11255 | 0.497 | 11525 | 0.562 | 12245 | 0.555 | 12515 | 0.553 | 13235 | 0.646 | 13455 | 0.361 | 14225 | 0.634 |
| 11311 | 0.942 | 11531 | 0.695 | 12251 | 0.649 | 12521 | 0.713 | 13241 | 0.697 | 13511 | 0.695 | 14231 | 0.767 |
| 11312 | 0.932 | 11532 | 0.686 | 12252 | 0.639 | 12522 | 0.704 | 13242 | 0.688 | 13512 | 0.686 | 14232 | 0.758 |
| 11313 | 0.898 | 11533 | 0.652 | 12253 | 0.605 | 12523 | 0.670 | 13243 | 0.654 | 13513 | 0.652 | 14233 | 0.724 |
| 11314 | 0.838 | 11534 | 0.591 | 12254 | 0.545 | 12524 | 0.609 | 13244 | 0.593 | 13514 | 0.591 | 14234 | 0.663 |
| 11315 | 0.765 | 11535 | 0.518 | 12255 | 0.472 | 12525 | 0.536 | 13245 | 0.520 | 13515 | 0.518 | 14235 | 0.590 |
| 11321 | 0.925 | 11541 | 0.569 | 12311 | 0.916 | 12531 | 0.670 | 13251 | 0.614 | 13521 | 0.678 | 14241 | 0.641 |
| 11322 | 0.915 | 11542 | 0.559 | 12312 | 0.907 | 12532 | 0.660 | 13252 | 0.604 | 13522 | 0.668 | 14242 | 0.632 |
| 11323 | 0.881 | 11543 | 0.525 | 12313 | 0.873 | 12533 | 0.626 | 13253 | 0.570 | 13523 | 0.634 | 14243 | 0.598 |
| 11324 | 0.821 | 11544 | 0.465 | 12314 | 0.812 | 12534 | 0.565 | 13254 | 0.509 | 13524 | 0.574 | 14244 | 0.537 |
| 11325 | 0.748 | 11545 | 0.392 | 12315 | 0.739 | 12535 | 0.493 | 13255 | 0.437 | 13525 | 0.501 | 14245 | 0.464 |
| 13531 | 0.634 | 14251 | 0.558 | 14521 | 0.622 | 15241 | 0.485 | 15511 | 0.483 | 21231 | 0.870 | 21451 | 0.585 |
| 13532 | 0.625 | 14252 | 0.548 | 14522 | 0.612 | 15242 | 0.475 | 15512 | 0.473 | 21232 | 0.861 | 21452 | 0.575 |
| 13533 | 0.591 | 14253 | 0.514 | 14523 | 0.578 | 15243 | 0.441 | 15513 | 0.439 | 21233 | 0.827 | 21453 | 0.541 |
| 13534 | 0.530 | 14254 | 0.453 | 14524 | 0.518 | 15244 | 0.380 | 15514 | 0.378 | 21234 | 0.766 | 21454 | 0.480 |
| 13535 | 0.457 | 14255 | 0.380 | 14525 | 0.445 | 15245 | 0.307 | 15515 | 0.305 | 21235 | 0.693 | 21455 | 0.408 |
| 13541 | 0.508 | 14311 | 0.825 | 14531 | 0.578 | 15251 | 0.401 | 15521 | 0.465 | 21241 | 0.744 | 21511 | 0.742 |
| 13542 | 0.499 | 14312 | 0.816 | 14532 | 0.569 | 15252 | 0.392 | 15522 | 0.456 | 21242 | 0.735 | 21512 | 0.732 |
| 13543 | 0.464 | 14313 | 0.781 | 14533 | 0.535 | 15253 | 0.358 | 15523 | 0.422 | 21243 | 0.700 | 21513 | 0.698 |
| 13544 | 0.404 | 14314 | 0.721 | 14534 | 0.474 | 15254 | 0.297 | 15524 | 0.361 | 21244 | 0.640 | 21514 | 0.638 |
| 13545 | 0.331 | 14315 | 0.648 | 14535 | 0.401 | 15255 | 0.224 | 15525 | 0.288 | 21245 | 0.567 | 21515 | 0.565 |
| 13551 | 0.425 | 14321 | 0.808 | 14541 | 0.452 | 15311 | 0.669 | 15531 | 0.422 | 21251 | 0.661 | 21521 | 0.725 |
| 13552 | 0.415 | 14322 | 0.798 | 14542 | 0.442 | 15312 | 0.659 | 15532 | 0.412 | 21252 | 0.651 | 21522 | 0.715 |
| 13553 | 0.381 | 14323 | 0.764 | 14543 | 0.408 | 15313 | 0.625 | 15533 | 0.378 | 21253 | 0.617 | 21523 | 0.681 |
| 13554 | 0.320 | 14324 | 0.704 | 14544 | 0.348 | 15314 | 0.564 | 15534 | 0.318 | 21254 | 0.556 | 21524 | 0.621 |
| 13555 | 0.247 | 14325 | 0.631 | 14545 | 0.275 | 15315 | 0.491 | 15535 | 0.245 | 21255 | 0.483 | 21525 | 0.548 |
| 14111 | 0.871 | 14331 | 0.764 | 14551 | 0.368 | 15321 | 0.651 | 15541 | 0.295 | 21311 | 0.928 | 21531 | 0.681 |
| 14112 | 0.861 | 14332 | 0.755 | 14552 | 0.359 | 15322 | 0.642 | 15542 | 0.286 | 21312 | 0.918 | 21532 | 0.672 |
| 14113 | 0.827 | 14333 | 0.721 | 14553 | 0.325 | 15323 | 0.608 | 15543 | 0.252 | 21313 | 0.884 | 21533 | 0.638 |
| 14114 | 0.766 | 14334 | 0.660 | 14554 | 0.264 | 15324 | 0.547 | 15544 | 0.191 | 21314 | 0.824 | 21534 | 0.577 |
| 14115 | 0.693 | 14335 | 0.587 | 14555 | 0.191 | 15325 | 0.474 | 15545 | 0.118 | 21315 | 0.751 | 21535 | 0.504 |
| 14121 | 0.853 | 14341 | 0.638 | 15111 | 0.714 | 15331 | 0.608 | 15551 | 0.212 | 21321 | 0.911 | 21541 | 0.555 |
| 14122 | 0.844 | 14342 | 0.628 | 15112 | 0.705 | 15332 | 0.598 | 15552 | 0.203 | 21322 | 0.901 | 21542 | 0.545 |
| 14123 | 0.810 | 14343 | 0.594 | 15113 | 0.670 | 15333 | 0.564 | 15553 | 0.168 | 21323 | 0.867 | 21543 | 0.511 |
| 14124 | 0.749 | 14344 | 0.534 | 15114 | 0.610 | 15334 | 0.504 | 15554 | 0.108 | 21324 | 0.807 | 21544 | 0.451 |
| 14125 | 0.676 | 14345 | 0.461 | 15115 | 0.537 | 15335 | 0.431 | 15555 | 0.035 | 21325 | 0.734 | 21545 | 0.378 |
| 14131 | 0.810 | 14351 | 0.554 | 15121 | 0.697 | 15341 | 0.481 | 21111 | 0.973 | 21331 | 0.867 | 21551 | 0.471 |
| 14132 | 0.800 | 14352 | 0.545 | 15122 | 0.687 | 15342 | 0.472 | 21112 | 0.964 | 21332 | 0.858 | 21552 | 0.462 |
| 14133 | 0.766 | 14353 | 0.511 | 15123 | 0.653 | 15343 | 0.438 | 21113 | 0.930 | 21333 | 0.824 | 21553 | 0.428 |
| 14134 | 0.706 | 14354 | 0.450 | 15124 | 0.593 | 15344 | 0.377 | 21114 | 0.869 | 21334 | 0.763 | 21554 | 0.367 |
| 14135 | 0.633 | 14355 | 0.377 | 15125 | 0.520 | 15345 | 0.304 | 21115 | 0.796 | 21335 | 0.690 | 21555 | 0.294 |
| 14141 | 0.683 | 14411 | 0.752 | 15131 | 0.653 | 15351 | 0.398 | 21121 | 0.956 | 21341 | 0.741 | 22111 | 0.948 |
| 14142 | 0.674 | 14412 | 0.743 | 15132 | 0.644 | 15352 | 0.389 | 21122 | 0.947 | 21342 | 0.731 | 22112 | 0.938 |
| 14143 | 0.640 | 14413 | 0.709 | 15133 | 0.610 | 15353 | 0.354 | 21123 | 0.913 | 21343 | 0.697 | 22113 | 0.904 |
| 14144 | 0.579 | 14414 | 0.648 | 15134 | 0.549 | 15354 | 0.294 | 21124 | 0.852 | 21344 | 0.637 | 22114 | 0.844 |
| 14145 | 0.506 | 14415 | 0.575 | 15135 | 0.476 | 15355 | 0.221 | 21125 | 0.779 | 21345 | 0.564 | 22115 | 0.771 |
| 14151 | 0.600 | 14421 | 0.735 | 15141 | 0.527 | 15411 | 0.596 | 21131 | 0.913 | 21351 | 0.657 | 22121 | 0.931 |
| 14152 | 0.591 | 14422 | 0.726 | 15142 | 0.518 | 15412 | 0.586 | 21132 | 0.903 | 21352 | 0.648 | 22122 | 0.921 |
| 14153 | 0.556 | 14423 | 0.692 | 15143 | 0.483 | 15413 | 0.552 | 21133 | 0.869 | 21353 | 0.614 | 22123 | 0.887 |
| 14154 | 0.496 | 14424 | 0.631 | 15144 | 0.423 | 15414 | 0.492 | 21134 | 0.808 | 21354 | 0.553 | 22124 | 0.827 |
| 14155 | 0.423 | 14425 | 0.558 | 15145 | 0.350 | 15415 | 0.419 | 21135 | 0.736 | 21355 | 0.480 | 22125 | 0.754 |
| 14211 | 0.828 | 14431 | 0.692 | 15151 | 0.444 | 15421 | 0.579 | 21141 | 0.786 | 21411 | 0.855 | 22131 | 0.887 |
| 14212 | 0.819 | 14432 | 0.682 | 15152 | 0.434 | 15422 | 0.569 | 21142 | 0.777 | 21412 | 0.846 | 22132 | 0.878 |
| 14213 | 0.785 | 14433 | 0.648 | 15153 | 0.400 | 15423 | 0.535 | 21143 | 0.743 | 21413 | 0.812 | 22133 | 0.844 |
| 14214 | 0.724 | 14434 | 0.587 | 15154 | 0.339 | 15424 | 0.474 | 21144 | 0.682 | 21414 | 0.751 | 22134 | 0.783 |
| 14215 | 0.651 | 14435 | 0.514 | 15155 | 0.266 | 15425 | 0.402 | 21145 | 0.609 | 21415 | 0.678 | 22135 | 0.710 |
| 14221 | 0.811 | 14441 | 0.565 | 15211 | 0.672 | 15431 | 0.535 | 21151 | 0.703 | 21421 | 0.838 | 22141 | 0.761 |
| 14222 | 0.802 | 14442 | 0.556 | 15212 | 0.662 | 15432 | 0.526 | 21152 | 0.693 | 21422 | 0.829 | 22142 | 0.751 |
| 14223 | 0.767 | 14443 | 0.522 | 15213 | 0.628 | 15433 | 0.491 | 21153 | 0.659 | 21423 | 0.795 | 22143 | 0.717 |
| 14224 | 0.707 | 14444 | 0.461 | 15214 | 0.567 | 15434 | 0.431 | 21154 | 0.599 | 21424 | 0.734 | 22144 | 0.657 |
| 14225 | 0.634 | 14445 | 0.388 | 15215 | 0.495 | 15435 | 0.358 | 21155 | 0.526 | 21425 | 0.661 | 22145 | 0.584 |
| 14231 | 0.767 | 14451 | 0.482 | 15221 | 0.655 | 15441 | 0.409 | 21211 | 0.931 | 21431 | 0.794 | 22151 | 0.677 |
| 14232 | 0.758 | 14452 | 0.472 | 15222 | 0.645 | 15442 | 0.399 | 21212 | 0.922 | 21432 | 0.785 | 22152 | 0.668 |
| 14233 | 0.724 | 14453 | 0.438 | 15223 | 0.611 | 15443 | 0.365 | 21213 | 0.888 | 21433 | 0.751 | 22153 | 0.634 |
| 14234 | 0.663 | 14454 | 0.377 | 15224 | 0.550 | 15444 | 0.304 | 21214 | 0.827 | 21434 | 0.690 | 22154 | 0.573 |
| 14235 | 0.590 | 14455 | 0.305 | 15225 | 0.477 | 15445 | 0.232 | 21215 | 0.754 | 21435 | 0.617 | 22155 | 0.500 |
| 14241 | 0.641 | 14511 | 0.639 | 15231 | 0.611 | 15451 | 0.325 | 21221 | 0.914 | 21441 | 0.668 | 22211 | 0.905 |
| 14242 | 0.632 | 14512 | 0.630 | 15232 | 0.601 | 15452 | 0.316 | 21222 | 0.904 | 21442 | 0.659 | 22212 | 0.896 |
| 14243 | 0.598 | 14513 | 0.595 | 15233 | 0.567 | 15453 | 0.282 | 21223 | 0.870 | 21443 | 0.625 | 22213 | 0.862 |
| 14244 | 0.537 | 14514 | 0.535 | 15234 | 0.507 | 15454 | 0.221 | 21224 | 0.810 | 21444 | 0.564 | 22214 | 0.801 |
| 14245 | 0.464 | 14515 | 0.462 | 15235 | 0.434 | 15455 | 0.148 | 21225 | 0.737 | 21445 | 0.491 | 22215 | 0.728 |
| 22221 | 0.888 | 22441 | 0.643 | 23211 | 0.870 | 23431 | 0.734 | 24151 | 0.586 | 24421 | 0.721 | 25141 | 0.513 |
| 22222 | 0.879 | 22442 | 0.633 | 23212 | 0.861 | 23432 | 0.724 | 24152 | 0.577 | 24422 | 0.712 | 25142 | 0.504 |
| 22223 | 0.845 | 22443 | 0.599 | 23213 | 0.827 | 23433 | 0.690 | 24153 | 0.542 | 24423 | 0.678 | 25143 | 0.469 |
| 22224 | 0.784 | 22444 | 0.538 | 23214 | 0.766 | 23434 | 0.629 | 24154 | 0.482 | 24424 | 0.617 | 25144 | 0.409 |
| 22225 | 0.711 | 22445 | 0.466 | 23215 | 0.693 | 23435 | 0.556 | 24155 | 0.409 | 24425 | 0.544 | 25145 | 0.336 |
| 22231 | 0.845 | 22451 | 0.559 | 23221 | 0.853 | 23441 | 0.607 | 24211 | 0.814 | 24431 | 0.678 | 25151 | 0.430 |
| 22232 | 0.835 | 22452 | 0.550 | 23222 | 0.844 | 23442 | 0.598 | 24212 | 0.805 | 24432 | 0.668 | 25152 | 0.420 |
| 22233 | 0.801 | 22453 | 0.516 | 23223 | 0.810 | 23443 | 0.564 | 24213 | 0.771 | 24433 | 0.634 | 25153 | 0.386 |
| 22234 | 0.740 | 22454 | 0.455 | 23224 | 0.749 | 23444 | 0.503 | 24214 | 0.710 | 24434 | 0.573 | 25154 | 0.325 |
| 22235 | 0.668 | 22455 | 0.382 | 23225 | 0.676 | 23445 | 0.430 | 24215 | 0.637 | 24435 | 0.500 | 25155 | 0.252 |
| 22241 | 0.718 | 22511 | 0.716 | 23231 | 0.809 | 23451 | 0.524 | 24221 | 0.797 | 24441 | 0.551 | 25211 | 0.658 |
| 22242 | 0.709 | 22512 | 0.707 | 23232 | 0.800 | 23452 | 0.514 | 24222 | 0.788 | 24442 | 0.542 | 25212 | 0.648 |
| 22243 | 0.675 | 22513 | 0.673 | 23233 | 0.766 | 23453 | 0.480 | 24223 | 0.754 | 24443 | 0.508 | 25213 | 0.614 |
| 22244 | 0.614 | 22514 | 0.612 | 23234 | 0.705 | 23454 | 0.420 | 24224 | 0.693 | 24444 | 0.447 | 25214 | 0.553 |
| 22245 | 0.541 | 22515 | 0.539 | 23235 | 0.632 | 23455 | 0.347 | 24225 | 0.620 | 24445 | 0.374 | 25215 | 0.481 |
| 22251 | 0.635 | 22521 | 0.699 | 23241 | 0.683 | 23511 | 0.681 | 24231 | 0.753 | 24451 | 0.468 | 25221 | 0.641 |
| 22252 | 0.625 | 22522 | 0.690 | 23242 | 0.674 | 23512 | 0.672 | 24232 | 0.744 | 24452 | 0.458 | 25222 | 0.631 |
| 22253 | 0.591 | 22523 | 0.656 | 23243 | 0.640 | 23513 | 0.638 | 24233 | 0.710 | 24453 | 0.424 | 25223 | 0.597 |
| 22254 | 0.531 | 22524 | 0.595 | 23244 | 0.579 | 23514 | 0.577 | 24234 | 0.649 | 24454 | 0.364 | 25224 | 0.536 |
| 22255 | 0.458 | 22525 | 0.522 | 23245 | 0.506 | 23515 | 0.504 | 24235 | 0.576 | 24455 | 0.291 | 25225 | 0.463 |
| 22311 | 0.902 | 22531 | 0.656 | 23251 | 0.600 | 23521 | 0.664 | 24241 | 0.627 | 24511 | 0.625 | 25231 | 0.597 |
| 22312 | 0.893 | 22532 | 0.646 | 23252 | 0.590 | 23522 | 0.654 | 24242 | 0.618 | 24512 | 0.616 | 25232 | 0.587 |
| 22313 | 0.859 | 22533 | 0.612 | 23253 | 0.556 | 23523 | 0.620 | 24243 | 0.584 | 24513 | 0.582 | 25233 | 0.553 |
| 22314 | 0.798 | 22534 | 0.551 | 23254 | 0.495 | 23524 | 0.560 | 24244 | 0.523 | 24514 | 0.521 | 25234 | 0.493 |
| 22315 | 0.725 | 22535 | 0.479 | 23255 | 0.423 | 23525 | 0.487 | 24245 | 0.450 | 24515 | 0.448 | 25235 | 0.420 |
| 22321 | 0.885 | 22541 | 0.529 | 23311 | 0.867 | 23531 | 0.620 | 24251 | 0.544 | 24521 | 0.608 | 25241 | 0.471 |
| 22322 | 0.876 | 22542 | 0.520 | 23312 | 0.858 | 23532 | 0.611 | 24252 | 0.534 | 24522 | 0.598 | 25242 | 0.461 |
| 22323 | 0.842 | 22543 | 0.486 | 23313 | 0.824 | 23533 | 0.577 | 24253 | 0.500 | 24523 | 0.564 | 25243 | 0.427 |
| 22324 | 0.781 | 22544 | 0.425 | 23314 | 0.763 | 23534 | 0.516 | 24254 | 0.439 | 24524 | 0.504 | 25244 | 0.366 |
| 22325 | 0.708 | 22545 | 0.352 | 23315 | 0.690 | 23535 | 0.443 | 24255 | 0.367 | 24525 | 0.431 | 25245 | 0.294 |
| 22331 | 0.842 | 22551 | 0.446 | 23321 | 0.850 | 23541 | 0.494 | 24311 | 0.811 | 24531 | 0.564 | 25251 | 0.387 |
| 22332 | 0.832 | 22552 | 0.436 | 23322 | 0.840 | 23542 | 0.485 | 24312 | 0.802 | 24532 | 0.555 | 25252 | 0.378 |
| 22333 | 0.798 | 22553 | 0.402 | 23323 | 0.806 | 23543 | 0.450 | 24313 | 0.767 | 24533 | 0.521 | 25253 | 0.344 |
| 22334 | 0.737 | 22554 | 0.342 | 23324 | 0.746 | 23544 | 0.390 | 24314 | 0.707 | 24534 | 0.460 | 25254 | 0.283 |
| 22335 | 0.665 | 22555 | 0.269 | 23325 | 0.673 | 23545 | 0.317 | 24315 | 0.634 | 24535 | 0.387 | 25255 | 0.210 |
| 22341 | 0.715 | 23111 | 0.913 | 23331 | 0.806 | 23551 | 0.411 | 24321 | 0.794 | 24541 | 0.438 | 25311 | 0.655 |
| 22342 | 0.706 | 23112 | 0.903 | 23332 | 0.797 | 23552 | 0.401 | 24322 | 0.784 | 24542 | 0.429 | 25312 | 0.645 |
| 22343 | 0.672 | 23113 | 0.869 | 23333 | 0.763 | 23553 | 0.367 | 24323 | 0.750 | 24543 | 0.394 | 25313 | 0.611 |
| 22344 | 0.611 | 23114 | 0.808 | 23334 | 0.702 | 23554 | 0.306 | 24324 | 0.690 | 24544 | 0.334 | 25314 | 0.550 |
| 22345 | 0.538 | 23115 | 0.735 | 23335 | 0.629 | 23555 | 0.233 | 24325 | 0.617 | 24545 | 0.261 | 25315 | 0.477 |
| 22351 | 0.632 | 23121 | 0.895 | 23341 | 0.680 | 24111 | 0.857 | 24331 | 0.750 | 24551 | 0.355 | 25321 | 0.637 |
| 22352 | 0.622 | 23122 | 0.886 | 23342 | 0.671 | 24112 | 0.847 | 24332 | 0.741 | 24552 | 0.345 | 25322 | 0.628 |
| 22353 | 0.588 | 23123 | 0.852 | 23343 | 0.636 | 24113 | 0.813 | 24333 | 0.707 | 24553 | 0.311 | 25323 | 0.594 |
| 22354 | 0.528 | 23124 | 0.791 | 23344 | 0.576 | 24114 | 0.752 | 24334 | 0.646 | 24554 | 0.250 | 25324 | 0.533 |
| 22355 | 0.455 | 23125 | 0.718 | 23345 | 0.503 | 24115 | 0.679 | 24335 | 0.573 | 24555 | 0.177 | 25325 | 0.460 |
| 22411 | 0.830 | 23131 | 0.852 | 23351 | 0.597 | 24121 | 0.839 | 24341 | 0.624 | 25111 | 0.700 | 25331 | 0.594 |
| 22412 | 0.820 | 23132 | 0.842 | 23352 | 0.587 | 24122 | 0.830 | 24342 | 0.615 | 25112 | 0.691 | 25332 | 0.584 |
| 22413 | 0.786 | 23133 | 0.808 | 23353 | 0.553 | 24123 | 0.796 | 24343 | 0.580 | 25113 | 0.657 | 25333 | 0.550 |
| 22414 | 0.725 | 23134 | 0.748 | 23354 | 0.492 | 24124 | 0.735 | 24344 | 0.520 | 25114 | 0.596 | 25334 | 0.490 |
| 22415 | 0.653 | 23135 | 0.675 | 23355 | 0.419 | 24125 | 0.662 | 24345 | 0.447 | 25115 | 0.523 | 25335 | 0.417 |
| 22421 | 0.813 | 23141 | 0.726 | 23411 | 0.794 | 24131 | 0.796 | 24351 | 0.541 | 25121 | 0.683 | 25341 | 0.467 |
| 22422 | 0.803 | 23142 | 0.716 | 23412 | 0.785 | 24132 | 0.786 | 24352 | 0.531 | 25122 | 0.673 | 25342 | 0.458 |
| 22423 | 0.769 | 23143 | 0.682 | 23413 | 0.751 | 24133 | 0.752 | 24353 | 0.497 | 25123 | 0.639 | 25343 | 0.424 |
| 22424 | 0.708 | 23144 | 0.621 | 23414 | 0.690 | 24134 | 0.692 | 24354 | 0.436 | 25124 | 0.579 | 25344 | 0.363 |
| 22425 | 0.635 | 23145 | 0.548 | 23415 | 0.617 | 24135 | 0.619 | 24355 | 0.363 | 25125 | 0.506 | 25345 | 0.290 |
| 22431 | 0.769 | 23151 | 0.642 | 23421 | 0.777 | 24141 | 0.670 | 24411 | 0.738 | 25131 | 0.639 | 25351 | 0.384 |
| 22432 | 0.759 | 23152 | 0.633 | 23422 | 0.768 | 24142 | 0.660 | 24412 | 0.729 | 25132 | 0.630 | 25352 | 0.375 |
| 22433 | 0.725 | 23153 | 0.599 | 23423 | 0.734 | 24143 | 0.626 | 24413 | 0.695 | 25133 | 0.596 | 25353 | 0.340 |
| 22434 | 0.665 | 23154 | 0.538 | 23424 | 0.673 | 24144 | 0.565 | 24414 | 0.634 | 25134 | 0.535 | 25354 | 0.280 |
| 22435 | 0.592 | 23155 | 0.465 | 23425 | 0.600 | 24145 | 0.492 | 24415 | 0.561 | 25135 | 0.462 | 25355 | 0.207 |
| 25411 | 0.582 | 31131 | 0.895 | 31351 | 0.639 | 32121 | 0.913 | 32341 | 0.697 | 33111 | 0.894 | 33331 | 0.788 |
| 25412 | 0.572 | 31132 | 0.885 | 31352 | 0.630 | 32122 | 0.903 | 32342 | 0.688 | 33112 | 0.885 | 33332 | 0.779 |
| 25413 | 0.538 | 31133 | 0.851 | 31353 | 0.596 | 32123 | 0.869 | 32343 | 0.654 | 33113 | 0.851 | 33333 | 0.745 |
| 25414 | 0.478 | 31134 | 0.790 | 31354 | 0.535 | 32124 | 0.808 | 32344 | 0.593 | 33114 | 0.790 | 33334 | 0.684 |
| 25415 | 0.405 | 31135 | 0.717 | 31355 | 0.462 | 32125 | 0.735 | 32345 | 0.520 | 33115 | 0.717 | 33335 | 0.611 |
| 25421 | 0.565 | 31141 | 0.768 | 31411 | 0.837 | 32131 | 0.869 | 32351 | 0.614 | 33121 | 0.877 | 33341 | 0.662 |
| 25422 | 0.555 | 31142 | 0.759 | 31412 | 0.828 | 32132 | 0.859 | 32352 | 0.604 | 33122 | 0.868 | 33342 | 0.652 |
| 25423 | 0.521 | 31143 | 0.725 | 31413 | 0.793 | 32133 | 0.825 | 32353 | 0.570 | 33123 | 0.834 | 33343 | 0.618 |
| 25424 | 0.460 | 31144 | 0.664 | 31414 | 0.733 | 32134 | 0.765 | 32354 | 0.509 | 33124 | 0.773 | 33344 | 0.558 |
| 25425 | 0.388 | 31145 | 0.591 | 31415 | 0.660 | 32135 | 0.692 | 32355 | 0.437 | 33125 | 0.700 | 33345 | 0.485 |
| 25431 | 0.521 | 31151 | 0.685 | 31421 | 0.820 | 32141 | 0.743 | 32411 | 0.811 | 33131 | 0.834 | 33351 | 0.578 |
| 25432 | 0.512 | 31152 | 0.675 | 31422 | 0.810 | 32142 | 0.733 | 32412 | 0.802 | 33132 | 0.824 | 33352 | 0.569 |
| 25433 | 0.478 | 31153 | 0.641 | 31423 | 0.776 | 32143 | 0.699 | 32413 | 0.768 | 33133 | 0.790 | 33353 | 0.535 |
| 25434 | 0.417 | 31154 | 0.580 | 31424 | 0.716 | 32144 | 0.638 | 32414 | 0.707 | 33134 | 0.729 | 33354 | 0.474 |
| 25435 | 0.344 | 31155 | 0.508 | 31425 | 0.643 | 32145 | 0.566 | 32415 | 0.634 | 33135 | 0.657 | 33355 | 0.401 |
| 25441 | 0.395 | 31211 | 0.913 | 31431 | 0.776 | 32151 | 0.659 | 32421 | 0.794 | 33141 | 0.707 | 33411 | 0.776 |
| 25442 | 0.385 | 31212 | 0.903 | 31432 | 0.767 | 32152 | 0.650 | 32422 | 0.785 | 33142 | 0.698 | 33412 | 0.767 |
| 25443 | 0.351 | 31213 | 0.869 | 31433 | 0.733 | 32153 | 0.616 | 32423 | 0.751 | 33143 | 0.664 | 33413 | 0.733 |
| 25444 | 0.290 | 31214 | 0.809 | 31434 | 0.672 | 32154 | 0.555 | 32424 | 0.690 | 33144 | 0.603 | 33414 | 0.672 |
| 25445 | 0.218 | 31215 | 0.736 | 31435 | 0.599 | 32155 | 0.482 | 32425 | 0.617 | 33145 | 0.530 | 33415 | 0.599 |
| 25451 | 0.311 | 31221 | 0.896 | 31441 | 0.650 | 32211 | 0.887 | 32431 | 0.751 | 33151 | 0.624 | 33421 | 0.759 |
| 25452 | 0.302 | 31222 | 0.886 | 31442 | 0.640 | 32212 | 0.878 | 32432 | 0.741 | 33152 | 0.614 | 33422 | 0.750 |
| 25453 | 0.268 | 31223 | 0.852 | 31443 | 0.606 | 32213 | 0.844 | 32433 | 0.707 | 33153 | 0.580 | 33423 | 0.715 |
| 25454 | 0.207 | 31224 | 0.791 | 31444 | 0.546 | 32214 | 0.783 | 32434 | 0.646 | 33154 | 0.520 | 33424 | 0.655 |
| 25455 | 0.134 | 31225 | 0.719 | 31445 | 0.473 | 32215 | 0.710 | 32435 | 0.574 | 33155 | 0.447 | 33425 | 0.582 |
| 25511 | 0.469 | 31231 | 0.852 | 31451 | 0.566 | 32221 | 0.870 | 32441 | 0.624 | 33211 | 0.852 | 33431 | 0.715 |
| 25512 | 0.459 | 31232 | 0.843 | 31452 | 0.557 | 32222 | 0.861 | 32442 | 0.615 | 33212 | 0.842 | 33432 | 0.706 |
| 25513 | 0.425 | 31233 | 0.809 | 31453 | 0.523 | 32223 | 0.827 | 32443 | 0.581 | 33213 | 0.808 | 33433 | 0.672 |
| 25514 | 0.364 | 31234 | 0.748 | 31454 | 0.462 | 32224 | 0.766 | 32444 | 0.520 | 33214 | 0.748 | 33434 | 0.611 |
| 25515 | 0.291 | 31235 | 0.675 | 31455 | 0.389 | 32225 | 0.693 | 32445 | 0.447 | 33215 | 0.675 | 33435 | 0.538 |
| 25521 | 0.451 | 31241 | 0.726 | 31511 | 0.724 | 32231 | 0.827 | 32451 | 0.541 | 33221 | 0.835 | 33441 | 0.589 |
| 25522 | 0.442 | 31242 | 0.716 | 31512 | 0.714 | 32232 | 0.817 | 32452 | 0.531 | 33222 | 0.825 | 33442 | 0.580 |
| 25523 | 0.408 | 31243 | 0.682 | 31513 | 0.680 | 32233 | 0.783 | 32453 | 0.497 | 33223 | 0.791 | 33443 | 0.546 |
| 25524 | 0.347 | 31244 | 0.622 | 31514 | 0.619 | 32234 | 0.722 | 32454 | 0.437 | 33224 | 0.731 | 33444 | 0.485 |
| 25525 | 0.274 | 31245 | 0.549 | 31515 | 0.547 | 32235 | 0.649 | 32455 | 0.364 | 33225 | 0.658 | 33445 | 0.412 |
| 25531 | 0.408 | 31251 | 0.642 | 31521 | 0.707 | 32241 | 0.700 | 32511 | 0.698 | 33231 | 0.791 | 33451 | 0.506 |
| 25532 | 0.398 | 31252 | 0.633 | 31522 | 0.697 | 32242 | 0.691 | 32512 | 0.689 | 33232 | 0.782 | 33452 | 0.496 |
| 25533 | 0.364 | 31253 | 0.599 | 31523 | 0.663 | 32243 | 0.657 | 32513 | 0.655 | 33233 | 0.748 | 33453 | 0.462 |
| 25534 | 0.304 | 31254 | 0.538 | 31524 | 0.602 | 32244 | 0.596 | 32514 | 0.594 | 33234 | 0.687 | 33454 | 0.401 |
| 25535 | 0.231 | 31255 | 0.465 | 31525 | 0.530 | 32245 | 0.523 | 32515 | 0.521 | 33235 | 0.614 | 33455 | 0.329 |
| 25541 | 0.282 | 31311 | 0.910 | 31531 | 0.663 | 32251 | 0.617 | 32521 | 0.681 | 33241 | 0.665 | 33511 | 0.663 |
| 25542 | 0.272 | 31312 | 0.900 | 31532 | 0.654 | 32252 | 0.607 | 32522 | 0.672 | 33242 | 0.655 | 33512 | 0.653 |
| 25543 | 0.238 | 31313 | 0.866 | 31533 | 0.619 | 32253 | 0.573 | 32523 | 0.638 | 33243 | 0.621 | 33513 | 0.619 |
| 25544 | 0.177 | 31314 | 0.805 | 31534 | 0.559 | 32254 | 0.512 | 32524 | 0.577 | 33244 | 0.561 | 33514 | 0.559 |
| 25545 | 0.104 | 31315 | 0.733 | 31535 | 0.486 | 32255 | 0.440 | 32525 | 0.504 | 33245 | 0.488 | 33515 | 0.486 |
| 25551 | 0.198 | 31321 | 0.893 | 31541 | 0.537 | 32311 | 0.884 | 32531 | 0.637 | 33251 | 0.581 | 33521 | 0.646 |
| 25552 | 0.189 | 31322 | 0.883 | 31542 | 0.527 | 32312 | 0.875 | 32532 | 0.628 | 33252 | 0.572 | 33522 | 0.636 |
| 25553 | 0.155 | 31323 | 0.849 | 31543 | 0.493 | 32313 | 0.841 | 32533 | 0.594 | 33253 | 0.538 | 33523 | 0.602 |
| 25554 | 0.094 | 31324 | 0.788 | 31544 | 0.432 | 32314 | 0.780 | 32534 | 0.533 | 33254 | 0.477 | 33524 | 0.541 |
| 25555 | 0.021 | 31325 | 0.716 | 31545 | 0.360 | 32315 | 0.707 | 32535 | 0.460 | 33255 | 0.404 | 33525 | 0.469 |
| 31111 | 0.955 | 31331 | 0.849 | 31551 | 0.453 | 32321 | 0.867 | 32541 | 0.511 | 33311 | 0.849 | 33531 | 0.602 |
| 31112 | 0.946 | 31332 | 0.840 | 31552 | 0.444 | 32322 | 0.858 | 32542 | 0.502 | 33312 | 0.839 | 33532 | 0.593 |
| 31113 | 0.912 | 31333 | 0.805 | 31553 | 0.410 | 32323 | 0.824 | 32543 | 0.468 | 33313 | 0.805 | 33533 | 0.559 |
| 31114 | 0.851 | 31334 | 0.745 | 31554 | 0.349 | 32324 | 0.763 | 32544 | 0.407 | 33314 | 0.745 | 33534 | 0.498 |
| 31115 | 0.778 | 31335 | 0.672 | 31555 | 0.276 | 32325 | 0.690 | 32545 | 0.334 | 33315 | 0.672 | 33535 | 0.425 |
| 31121 | 0.938 | 31341 | 0.723 | 32111 | 0.930 | 32331 | 0.823 | 32551 | 0.428 | 33321 | 0.832 | 33541 | 0.476 |
| 31122 | 0.929 | 31342 | 0.713 | 32112 | 0.920 | 32332 | 0.814 | 32552 | 0.418 | 33322 | 0.822 | 33542 | 0.466 |
| 31123 | 0.895 | 31343 | 0.679 | 32113 | 0.886 | 32333 | 0.780 | 32553 | 0.384 | 33323 | 0.788 | 33543 | 0.432 |
| 31124 | 0.834 | 31344 | 0.618 | 32114 | 0.825 | 32334 | 0.719 | 32554 | 0.323 | 33324 | 0.727 | 33544 | 0.372 |
| 31125 | 0.761 | 31345 | 0.546 | 32115 | 0.753 | 32335 | 0.646 | 32555 | 0.251 | 33325 | 0.655 | 33545 | 0.299 |
| 33551 | 0.392 | 34321 | 0.776 | 34541 | 0.420 | 35311 | 0.636 | 35531 | 0.390 | 41251 | 0.567 | 41521 | 0.631 |
| 33552 | 0.383 | 34322 | 0.766 | 34542 | 0.410 | 35312 | 0.627 | 35532 | 0.380 | 41252 | 0.557 | 41522 | 0.622 |
| 33553 | 0.349 | 34323 | 0.732 | 34543 | 0.376 | 35313 | 0.593 | 35533 | 0.346 | 41253 | 0.523 | 41523 | 0.588 |
| 33554 | 0.288 | 34324 | 0.671 | 34544 | 0.316 | 35314 | 0.532 | 35534 | 0.285 | 41254 | 0.463 | 41524 | 0.527 |
| 33555 | 0.215 | 34325 | 0.599 | 34545 | 0.243 | 35315 | 0.459 | 35535 | 0.213 | 41255 | 0.390 | 41525 | 0.454 |
| 34111 | 0.838 | 34331 | 0.732 | 34551 | 0.336 | 35321 | 0.619 | 35541 | 0.263 | 41311 | 0.834 | 41531 | 0.587 |
| 34112 | 0.829 | 34332 | 0.723 | 34552 | 0.327 | 35322 | 0.610 | 35542 | 0.254 | 41312 | 0.825 | 41532 | 0.578 |
| 34113 | 0.795 | 34333 | 0.689 | 34553 | 0.293 | 35323 | 0.576 | 35543 | 0.220 | 41313 | 0.791 | 41533 | 0.544 |
| 34114 | 0.734 | 34334 | 0.628 | 34554 | 0.232 | 35324 | 0.515 | 35544 | 0.159 | 41314 | 0.730 | 41534 | 0.483 |
| 34115 | 0.661 | 34335 | 0.555 | 34555 | 0.159 | 35325 | 0.442 | 35545 | 0.086 | 41315 | 0.657 | 41535 | 0.410 |
| 34121 | 0.821 | 34341 | 0.606 | 35111 | 0.682 | 35331 | 0.576 | 35551 | 0.180 | 41321 | 0.817 | 41541 | 0.461 |
| 34122 | 0.812 | 34342 | 0.596 | 35112 | 0.672 | 35332 | 0.566 | 35552 | 0.170 | 41322 | 0.808 | 41542 | 0.452 |
| 34123 | 0.778 | 34343 | 0.562 | 35113 | 0.638 | 35333 | 0.532 | 35553 | 0.136 | 41323 | 0.774 | 41543 | 0.418 |
| 34124 | 0.717 | 34344 | 0.502 | 35114 | 0.578 | 35334 | 0.471 | 35554 | 0.076 | 41324 | 0.713 | 41544 | 0.357 |
| 34125 | 0.644 | 34345 | 0.429 | 35115 | 0.505 | 35335 | 0.399 | 35555 | 0.003 | 41325 | 0.640 | 41545 | 0.284 |
| 34131 | 0.778 | 34351 | 0.522 | 35121 | 0.665 | 35341 | 0.449 | 41111 | 0.880 | 41331 | 0.773 | 41551 | 0.378 |
| 34132 | 0.768 | 34352 | 0.513 | 35122 | 0.655 | 35342 | 0.440 | 41112 | 0.870 | 41332 | 0.764 | 41552 | 0.368 |
| 34133 | 0.734 | 34353 | 0.479 | 35123 | 0.621 | 35343 | 0.406 | 41113 | 0.836 | 41333 | 0.730 | 41553 | 0.334 |
| 34134 | 0.673 | 34354 | 0.418 | 35124 | 0.560 | 35344 | 0.345 | 41114 | 0.775 | 41334 | 0.669 | 41554 | 0.273 |
| 34135 | 0.601 | 34355 | 0.345 | 35125 | 0.488 | 35345 | 0.272 | 41115 | 0.703 | 41335 | 0.596 | 41555 | 0.201 |
| 34141 | 0.651 | 34411 | 0.720 | 35131 | 0.621 | 35351 | 0.366 | 41121 | 0.863 | 41341 | 0.647 | 42111 | 0.854 |
| 34142 | 0.642 | 34412 | 0.711 | 35132 | 0.612 | 35352 | 0.356 | 41122 | 0.853 | 41342 | 0.638 | 42112 | 0.845 |
| 34143 | 0.608 | 34413 | 0.677 | 35133 | 0.578 | 35353 | 0.322 | 41123 | 0.819 | 41343 | 0.604 | 42113 | 0.811 |
| 34144 | 0.547 | 34414 | 0.616 | 35134 | 0.517 | 35354 | 0.262 | 41124 | 0.758 | 41344 | 0.543 | 42114 | 0.750 |
| 34145 | 0.474 | 34415 | 0.543 | 35135 | 0.444 | 35355 | 0.189 | 41125 | 0.686 | 41345 | 0.470 | 42115 | 0.677 |
| 34151 | 0.568 | 34421 | 0.703 | 35141 | 0.495 | 35411 | 0.564 | 41131 | 0.819 | 41351 | 0.564 | 42121 | 0.837 |
| 34152 | 0.558 | 34422 | 0.694 | 35142 | 0.485 | 35412 | 0.554 | 41132 | 0.809 | 41352 | 0.554 | 42122 | 0.828 |
| 34153 | 0.524 | 34423 | 0.659 | 35143 | 0.451 | 35413 | 0.520 | 41133 | 0.775 | 41353 | 0.520 | 42123 | 0.793 |
| 34154 | 0.464 | 34424 | 0.599 | 35144 | 0.391 | 35414 | 0.459 | 41134 | 0.715 | 41354 | 0.459 | 42124 | 0.733 |
| 34155 | 0.391 | 34425 | 0.526 | 35145 | 0.318 | 35415 | 0.387 | 41135 | 0.642 | 41355 | 0.387 | 42125 | 0.660 |
| 34211 | 0.796 | 34431 | 0.659 | 35151 | 0.411 | 35421 | 0.546 | 41141 | 0.693 | 41411 | 0.761 | 42131 | 0.793 |
| 34212 | 0.786 | 34432 | 0.650 | 35152 | 0.402 | 35422 | 0.537 | 41142 | 0.683 | 41412 | 0.752 | 42132 | 0.784 |
| 34213 | 0.752 | 34433 | 0.616 | 35153 | 0.368 | 35423 | 0.503 | 41143 | 0.649 | 41413 | 0.718 | 42133 | 0.750 |
| 34214 | 0.692 | 34434 | 0.555 | 35154 | 0.307 | 35424 | 0.442 | 41144 | 0.588 | 41414 | 0.657 | 42134 | 0.689 |
| 34215 | 0.619 | 34435 | 0.482 | 35155 | 0.234 | 35425 | 0.369 | 41145 | 0.516 | 41415 | 0.584 | 42135 | 0.616 |
| 34221 | 0.779 | 34441 | 0.533 | 35211 | 0.639 | 35431 | 0.503 | 41151 | 0.609 | 41421 | 0.744 | 42141 | 0.667 |
| 34222 | 0.769 | 34442 | 0.524 | 35212 | 0.630 | 35432 | 0.493 | 41152 | 0.600 | 41422 | 0.735 | 42142 | 0.658 |
| 34223 | 0.735 | 34443 | 0.490 | 35213 | 0.596 | 35433 | 0.459 | 41153 | 0.566 | 41423 | 0.701 | 42143 | 0.624 |
| 34224 | 0.675 | 34444 | 0.429 | 35214 | 0.535 | 35434 | 0.399 | 41154 | 0.505 | 41424 | 0.640 | 42144 | 0.563 |
| 34225 | 0.602 | 34445 | 0.356 | 35215 | 0.462 | 35435 | 0.326 | 41155 | 0.432 | 41425 | 0.567 | 42145 | 0.490 |
| 34231 | 0.735 | 34451 | 0.450 | 35221 | 0.622 | 35441 | 0.377 | 41211 | 0.837 | 41431 | 0.701 | 42151 | 0.584 |
| 34232 | 0.726 | 34452 | 0.440 | 35222 | 0.613 | 35442 | 0.367 | 41212 | 0.828 | 41432 | 0.691 | 42152 | 0.574 |
| 34233 | 0.692 | 34453 | 0.406 | 35223 | 0.579 | 35443 | 0.333 | 41213 | 0.794 | 41433 | 0.657 | 42153 | 0.540 |
| 34234 | 0.631 | 34454 | 0.345 | 35224 | 0.518 | 35444 | 0.272 | 41214 | 0.733 | 41434 | 0.596 | 42154 | 0.479 |
| 34235 | 0.558 | 34455 | 0.272 | 35225 | 0.445 | 35445 | 0.199 | 41215 | 0.660 | 41435 | 0.524 | 42155 | 0.407 |
| 34241 | 0.609 | 34511 | 0.607 | 35231 | 0.579 | 35451 | 0.293 | 41221 | 0.820 | 41441 | 0.574 | 42211 | 0.812 |
| 34242 | 0.599 | 34512 | 0.597 | 35232 | 0.569 | 35452 | 0.284 | 41222 | 0.811 | 41442 | 0.565 | 42212 | 0.802 |
| 34243 | 0.565 | 34513 | 0.563 | 35233 | 0.535 | 35453 | 0.250 | 41223 | 0.777 | 41443 | 0.531 | 42213 | 0.768 |
| 34244 | 0.505 | 34514 | 0.503 | 35234 | 0.474 | 35454 | 0.189 | 41224 | 0.716 | 41444 | 0.470 | 42214 | 0.707 |
| 34245 | 0.432 | 34515 | 0.430 | 35235 | 0.402 | 35455 | 0.116 | 41225 | 0.643 | 41445 | 0.397 | 42215 | 0.635 |
| 34251 | 0.525 | 34521 | 0.590 | 35241 | 0.452 | 35511 | 0.450 | 41231 | 0.777 | 41451 | 0.491 | 42221 | 0.795 |
| 34252 | 0.516 | 34522 | 0.580 | 35242 | 0.443 | 35512 | 0.441 | 41232 | 0.767 | 41452 | 0.481 | 42222 | 0.785 |
| 34253 | 0.482 | 34523 | 0.546 | 35243 | 0.409 | 35513 | 0.407 | 41233 | 0.733 | 41453 | 0.447 | 42223 | 0.751 |
| 34254 | 0.421 | 34524 | 0.485 | 35244 | 0.348 | 35514 | 0.346 | 41234 | 0.672 | 41454 | 0.387 | 42224 | 0.690 |
| 34255 | 0.348 | 34525 | 0.413 | 35245 | 0.275 | 35515 | 0.273 | 41235 | 0.599 | 41455 | 0.314 | 42225 | 0.618 |
| 34311 | 0.793 | 34531 | 0.546 | 35251 | 0.369 | 35521 | 0.433 | 41241 | 0.650 | 41511 | 0.648 | 42231 | 0.751 |
| 34312 | 0.783 | 34532 | 0.537 | 35252 | 0.359 | 35522 | 0.424 | 41242 | 0.641 | 41512 | 0.639 | 42232 | 0.742 |
| 34313 | 0.749 | 34533 | 0.503 | 35253 | 0.325 | 35523 | 0.390 | 41243 | 0.607 | 41513 | 0.605 | 42233 | 0.707 |
| 34314 | 0.689 | 34534 | 0.442 | 35254 | 0.265 | 35524 | 0.329 | 41244 | 0.546 | 41514 | 0.544 | 42234 | 0.647 |
| 34315 | 0.616 | 34535 | 0.369 | 35255 | 0.192 | 35525 | 0.256 | 41245 | 0.473 | 41515 | 0.471 | 42235 | 0.574 |
| 42241 | 0.625 | 42511 | 0.623 | 43231 | 0.716 | 43451 | 0.430 | 44221 | 0.703 | 44441 | 0.457 | 45211 | 0.564 |
| 42242 | 0.615 | 42512 | 0.613 | 43232 | 0.706 | 43452 | 0.421 | 44222 | 0.694 | 44442 | 0.448 | 45212 | 0.554 |
| 42243 | 0.581 | 42513 | 0.579 | 43233 | 0.672 | 43453 | 0.387 | 44223 | 0.660 | 44443 | 0.414 | 45213 | 0.520 |
| 42244 | 0.520 | 42514 | 0.518 | 43234 | 0.611 | 43454 | 0.326 | 44224 | 0.599 | 44444 | 0.353 | 45214 | 0.460 |
| 42245 | 0.448 | 42515 | 0.446 | 43235 | 0.539 | 43455 | 0.253 | 44225 | 0.526 | 44445 | 0.280 | 45215 | 0.387 |
| 42251 | 0.541 | 42521 | 0.606 | 43241 | 0.589 | 43511 | 0.587 | 44231 | 0.660 | 44451 | 0.374 | 45221 | 0.547 |
| 42252 | 0.532 | 42522 | 0.596 | 43242 | 0.580 | 43512 | 0.578 | 44232 | 0.650 | 44452 | 0.365 | 45222 | 0.537 |
| 42253 | 0.498 | 42523 | 0.562 | 43243 | 0.546 | 43513 | 0.544 | 44233 | 0.616 | 44453 | 0.330 | 45223 | 0.503 |
| 42254 | 0.437 | 42524 | 0.501 | 43244 | 0.485 | 43514 | 0.483 | 44234 | 0.555 | 44454 | 0.270 | 45224 | 0.443 |
| 42255 | 0.364 | 42525 | 0.428 | 43245 | 0.412 | 43515 | 0.410 | 44235 | 0.483 | 44455 | 0.197 | 45225 | 0.370 |
| 42311 | 0.809 | 42531 | 0.562 | 43251 | 0.506 | 43521 | 0.570 | 44241 | 0.533 | 44511 | 0.531 | 45231 | 0.503 |
| 42312 | 0.799 | 42532 | 0.552 | 43252 | 0.496 | 43522 | 0.561 | 44242 | 0.524 | 44512 | 0.522 | 45232 | 0.494 |
| 42313 | 0.765 | 42533 | 0.518 | 43253 | 0.462 | 43523 | 0.527 | 44243 | 0.490 | 44513 | 0.488 | 45233 | 0.460 |
| 42314 | 0.704 | 42534 | 0.458 | 43254 | 0.402 | 43524 | 0.466 | 44244 | 0.429 | 44514 | 0.427 | 45234 | 0.399 |
| 42315 | 0.632 | 42535 | 0.385 | 43255 | 0.329 | 43525 | 0.393 | 44245 | 0.356 | 44515 | 0.354 | 45235 | 0.326 |
| 42321 | 0.792 | 42541 | 0.436 | 43311 | 0.773 | 43531 | 0.527 | 44251 | 0.450 | 44521 | 0.514 | 45241 | 0.377 |
| 42322 | 0.782 | 42542 | 0.426 | 43312 | 0.764 | 43532 | 0.517 | 44252 | 0.440 | 44522 | 0.505 | 45242 | 0.367 |
| 42323 | 0.748 | 42543 | 0.392 | 43313 | 0.730 | 43533 | 0.483 | 44253 | 0.406 | 44523 | 0.471 | 45243 | 0.333 |
| 42324 | 0.687 | 42544 | 0.331 | 43314 | 0.669 | 43534 | 0.422 | 44254 | 0.346 | 44524 | 0.410 | 45244 | 0.273 |
| 42325 | 0.614 | 42545 | 0.259 | 43315 | 0.596 | 43535 | 0.349 | 44255 | 0.273 | 44525 | 0.337 | 45245 | 0.200 |
| 42331 | 0.748 | 42551 | 0.352 | 43321 | 0.756 | 43541 | 0.400 | 44311 | 0.717 | 44531 | 0.471 | 45251 | 0.293 |
| 42332 | 0.738 | 42552 | 0.343 | 43322 | 0.747 | 43542 | 0.391 | 44312 | 0.708 | 44532 | 0.461 | 45252 | 0.284 |
| 42333 | 0.704 | 42553 | 0.309 | 43323 | 0.713 | 43543 | 0.357 | 44313 | 0.674 | 44533 | 0.427 | 45253 | 0.250 |
| 42334 | 0.644 | 42554 | 0.248 | 43324 | 0.652 | 43544 | 0.296 | 44314 | 0.613 | 44534 | 0.366 | 45254 | 0.189 |
| 42335 | 0.571 | 42555 | 0.175 | 43325 | 0.579 | 43545 | 0.223 | 44315 | 0.540 | 44535 | 0.293 | 45255 | 0.116 |
| 42341 | 0.622 | 43111 | 0.819 | 43331 | 0.713 | 43551 | 0.317 | 44321 | 0.700 | 44541 | 0.344 | 45311 | 0.561 |
| 42342 | 0.612 | 43112 | 0.809 | 43332 | 0.703 | 43552 | 0.307 | 44322 | 0.691 | 44542 | 0.335 | 45312 | 0.551 |
| 42343 | 0.578 | 43113 | 0.775 | 43333 | 0.669 | 43553 | 0.273 | 44323 | 0.657 | 44543 | 0.301 | 45313 | 0.517 |
| 42344 | 0.517 | 43114 | 0.715 | 43334 | 0.608 | 43554 | 0.213 | 44324 | 0.596 | 44544 | 0.240 | 45314 | 0.457 |
| 42345 | 0.444 | 43115 | 0.642 | 43335 | 0.535 | 43555 | 0.140 | 44325 | 0.523 | 44545 | 0.167 | 45315 | 0.384 |
| 42351 | 0.538 | 43121 | 0.802 | 43341 | 0.586 | 44111 | 0.763 | 44331 | 0.657 | 44551 | 0.261 | 45321 | 0.544 |
| 42352 | 0.529 | 43122 | 0.792 | 43342 | 0.577 | 44112 | 0.753 | 44332 | 0.647 | 44552 | 0.251 | 45322 | 0.534 |
| 42353 | 0.495 | 43123 | 0.758 | 43343 | 0.543 | 44113 | 0.719 | 44333 | 0.613 | 44553 | 0.217 | 45323 | 0.500 |
| 42354 | 0.434 | 43124 | 0.697 | 43344 | 0.482 | 44114 | 0.659 | 44334 | 0.552 | 44554 | 0.157 | 45324 | 0.439 |
| 42355 | 0.361 | 43125 | 0.625 | 43345 | 0.409 | 44115 | 0.586 | 44335 | 0.479 | 44555 | 0.084 | 45325 | 0.367 |
| 42411 | 0.736 | 43131 | 0.758 | 43351 | 0.503 | 44121 | 0.746 | 44341 | 0.530 | 45111 | 0.606 | 45331 | 0.500 |
| 42412 | 0.726 | 43132 | 0.749 | 43352 | 0.493 | 44122 | 0.736 | 44342 | 0.521 | 45112 | 0.597 | 45332 | 0.491 |
| 42413 | 0.692 | 43133 | 0.715 | 43353 | 0.459 | 44123 | 0.702 | 44343 | 0.487 | 45113 | 0.563 | 45333 | 0.457 |
| 42414 | 0.632 | 43134 | 0.654 | 43354 | 0.399 | 44124 | 0.641 | 44344 | 0.426 | 45114 | 0.502 | 45334 | 0.396 |
| 42415 | 0.559 | 43135 | 0.581 | 43355 | 0.326 | 44125 | 0.569 | 44345 | 0.353 | 45115 | 0.429 | 45335 | 0.323 |
| 42421 | 0.719 | 43141 | 0.632 | 43411 | 0.701 | 44131 | 0.702 | 44351 | 0.447 | 45121 | 0.589 | 45341 | 0.374 |
| 42422 | 0.709 | 43142 | 0.622 | 43412 | 0.691 | 44132 | 0.693 | 44352 | 0.437 | 45122 | 0.580 | 45342 | 0.364 |
| 42423 | 0.675 | 43143 | 0.588 | 43413 | 0.657 | 44133 | 0.659 | 44353 | 0.403 | 45123 | 0.546 | 45343 | 0.330 |
| 42424 | 0.615 | 43144 | 0.528 | 43414 | 0.596 | 44134 | 0.598 | 44354 | 0.342 | 45124 | 0.485 | 45344 | 0.269 |
| 42425 | 0.542 | 43145 | 0.455 | 43415 | 0.523 | 44135 | 0.525 | 44355 | 0.270 | 45125 | 0.412 | 45345 | 0.197 |
| 42431 | 0.675 | 43151 | 0.548 | 43421 | 0.683 | 44141 | 0.576 | 44411 | 0.645 | 45131 | 0.546 | 45351 | 0.290 |
| 42432 | 0.666 | 43152 | 0.539 | 43422 | 0.674 | 44142 | 0.566 | 44412 | 0.635 | 45132 | 0.536 | 45352 | 0.281 |
| 42433 | 0.632 | 43153 | 0.505 | 43423 | 0.640 | 44143 | 0.532 | 44413 | 0.601 | 45133 | 0.502 | 45353 | 0.247 |
| 42434 | 0.571 | 43154 | 0.444 | 43424 | 0.579 | 44144 | 0.471 | 44414 | 0.540 | 45134 | 0.441 | 45354 | 0.186 |
| 42435 | 0.498 | 43155 | 0.371 | 43425 | 0.506 | 44145 | 0.399 | 44415 | 0.467 | 45135 | 0.368 | 45355 | 0.113 |
| 42441 | 0.549 | 43211 | 0.776 | 43431 | 0.640 | 44151 | 0.492 | 44421 | 0.627 | 45141 | 0.419 | 45411 | 0.488 |
| 42442 | 0.539 | 43212 | 0.767 | 43432 | 0.630 | 44152 | 0.483 | 44422 | 0.618 | 45142 | 0.410 | 45412 | 0.479 |
| 42443 | 0.505 | 43213 | 0.733 | 43433 | 0.596 | 44153 | 0.449 | 44423 | 0.584 | 45143 | 0.376 | 45413 | 0.445 |
| 42444 | 0.445 | 43214 | 0.672 | 43434 | 0.536 | 44154 | 0.388 | 44424 | 0.523 | 45144 | 0.315 | 45414 | 0.384 |
| 42445 | 0.372 | 43215 | 0.599 | 43435 | 0.463 | 44155 | 0.315 | 44425 | 0.450 | 45145 | 0.242 | 45415 | 0.311 |
| 42451 | 0.465 | 43221 | 0.759 | 43441 | 0.514 | 44211 | 0.720 | 44431 | 0.584 | 45151 | 0.336 | 45421 | 0.471 |
| 42452 | 0.456 | 43222 | 0.750 | 43442 | 0.504 | 44212 | 0.711 | 44432 | 0.574 | 45152 | 0.326 | 45422 | 0.461 |
| 42453 | 0.422 | 43223 | 0.716 | 43443 | 0.470 | 44213 | 0.677 | 44433 | 0.540 | 45153 | 0.292 | 45423 | 0.427 |
| 42454 | 0.361 | 43224 | 0.655 | 43444 | 0.409 | 44214 | 0.616 | 44434 | 0.480 | 45154 | 0.232 | 45424 | 0.367 |
| 42455 | 0.288 | 43225 | 0.582 | 43445 | 0.336 | 44215 | 0.543 | 44435 | 0.407 | 45155 | 0.159 | 45425 | 0.294 |
| 45431 | 0.427 | 51151 | 0.418 | 51421 | 0.553 | 52141 | 0.476 | 52411 | 0.545 | 53131 | 0.567 | 53351 | 0.312 |
| 45432 | 0.418 | 51152 | 0.409 | 51422 | 0.544 | 52142 | 0.467 | 52412 | 0.535 | 53132 | 0.558 | 53352 | 0.302 |
| 45433 | 0.384 | 51153 | 0.375 | 51423 | 0.510 | 52143 | 0.433 | 52413 | 0.501 | 53133 | 0.524 | 53353 | 0.268 |
| 45434 | 0.323 | 51154 | 0.314 | 51424 | 0.449 | 52144 | 0.372 | 52414 | 0.441 | 53134 | 0.463 | 53354 | 0.208 |
| 45435 | 0.250 | 51155 | 0.241 | 51425 | 0.376 | 52145 | 0.299 | 52415 | 0.368 | 53135 | 0.390 | 53355 | 0.135 |
| 45441 | 0.301 | 51211 | 0.646 | 51431 | 0.510 | 52151 | 0.393 | 52421 | 0.528 | 53141 | 0.441 | 53411 | 0.510 |
| 45442 | 0.292 | 51212 | 0.637 | 51432 | 0.500 | 52152 | 0.383 | 52422 | 0.518 | 53142 | 0.431 | 53412 | 0.500 |
| 45443 | 0.257 | 51213 | 0.603 | 51433 | 0.466 | 52153 | 0.349 | 52423 | 0.484 | 53143 | 0.397 | 53413 | 0.466 |
| 45444 | 0.197 | 51214 | 0.542 | 51434 | 0.405 | 52154 | 0.288 | 52424 | 0.424 | 53144 | 0.337 | 53414 | 0.405 |
| 45445 | 0.124 | 51215 | 0.469 | 51435 | 0.333 | 52155 | 0.216 | 52425 | 0.351 | 53145 | 0.264 | 53415 | 0.333 |
| 45451 | 0.218 | 51221 | 0.629 | 51441 | 0.383 | 52211 | 0.621 | 52431 | 0.484 | 53151 | 0.357 | 53421 | 0.492 |
| 45452 | 0.208 | 51222 | 0.620 | 51442 | 0.374 | 52212 | 0.611 | 52432 | 0.475 | 53152 | 0.348 | 53422 | 0.483 |
| 45453 | 0.174 | 51223 | 0.586 | 51443 | 0.340 | 52213 | 0.577 | 52433 | 0.441 | 53153 | 0.314 | 53423 | 0.449 |
| 45454 | 0.113 | 51224 | 0.525 | 51444 | 0.279 | 52214 | 0.516 | 52434 | 0.380 | 53154 | 0.253 | 53424 | 0.388 |
| 45455 | 0.040 | 51225 | 0.452 | 51445 | 0.206 | 52215 | 0.444 | 52435 | 0.307 | 53155 | 0.180 | 53425 | 0.315 |
| 45511 | 0.375 | 51231 | 0.586 | 51451 | 0.300 | 52221 | 0.604 | 52441 | 0.358 | 53211 | 0.585 | 53431 | 0.449 |
| 45512 | 0.365 | 51232 | 0.576 | 51452 | 0.290 | 52222 | 0.594 | 52442 | 0.348 | 53212 | 0.576 | 53432 | 0.439 |
| 45513 | 0.331 | 51233 | 0.542 | 51453 | 0.256 | 52223 | 0.560 | 52443 | 0.314 | 53213 | 0.542 | 53433 | 0.405 |
| 45514 | 0.271 | 51234 | 0.481 | 51454 | 0.196 | 52224 | 0.499 | 52444 | 0.254 | 53214 | 0.481 | 53434 | 0.345 |
| 45515 | 0.198 | 51235 | 0.409 | 51455 | 0.123 | 52225 | 0.427 | 52445 | 0.181 | 53215 | 0.408 | 53435 | 0.272 |
| 45521 | 0.358 | 51241 | 0.459 | 51511 | 0.457 | 52231 | 0.560 | 52451 | 0.274 | 53221 | 0.568 | 53441 | 0.323 |
| 45522 | 0.348 | 51242 | 0.450 | 51512 | 0.448 | 52232 | 0.551 | 52452 | 0.265 | 53222 | 0.559 | 53442 | 0.313 |
| 45523 | 0.314 | 51243 | 0.416 | 51513 | 0.414 | 52233 | 0.516 | 52453 | 0.231 | 53223 | 0.525 | 53443 | 0.279 |
| 45524 | 0.253 | 51244 | 0.355 | 51514 | 0.353 | 52234 | 0.456 | 52454 | 0.170 | 53224 | 0.464 | 53444 | 0.218 |
| 45525 | 0.181 | 51245 | 0.282 | 51515 | 0.280 | 52235 | 0.383 | 52455 | 0.097 | 53225 | 0.391 | 53445 | 0.145 |
| 45531 | 0.314 | 51251 | 0.376 | 51521 | 0.440 | 52241 | 0.434 | 52511 | 0.432 | 53231 | 0.525 | 53451 | 0.239 |
| 45532 | 0.305 | 51252 | 0.366 | 51522 | 0.431 | 52242 | 0.424 | 52512 | 0.422 | 53232 | 0.515 | 53452 | 0.230 |
| 45533 | 0.271 | 51253 | 0.332 | 51523 | 0.397 | 52243 | 0.390 | 52513 | 0.388 | 53233 | 0.481 | 53453 | 0.196 |
| 45534 | 0.210 | 51254 | 0.272 | 51524 | 0.336 | 52244 | 0.329 | 52514 | 0.327 | 53234 | 0.420 | 53454 | 0.135 |
| 45535 | 0.137 | 51255 | 0.199 | 51525 | 0.263 | 52245 | 0.257 | 52515 | 0.255 | 53235 | 0.348 | 53455 | 0.062 |
| 45541 | 0.188 | 51311 | 0.643 | 51531 | 0.397 | 52251 | 0.350 | 52521 | 0.415 | 53241 | 0.398 | 53511 | 0.396 |
| 45542 | 0.178 | 51312 | 0.634 | 51532 | 0.387 | 52252 | 0.341 | 52522 | 0.405 | 53242 | 0.389 | 53512 | 0.387 |
| 45543 | 0.144 | 51313 | 0.600 | 51533 | 0.353 | 52253 | 0.307 | 52523 | 0.371 | 53243 | 0.355 | 53513 | 0.353 |
| 45544 | 0.083 | 51314 | 0.539 | 51534 | 0.292 | 52254 | 0.246 | 52524 | 0.310 | 53244 | 0.294 | 53514 | 0.292 |
| 45545 | 0.011 | 51315 | 0.466 | 51535 | 0.219 | 52255 | 0.173 | 52525 | 0.237 | 53245 | 0.221 | 53515 | 0.219 |
| 45551 | 0.104 | 51321 | 0.626 | 51541 | 0.270 | 52311 | 0.618 | 52531 | 0.371 | 53251 | 0.315 | 53521 | 0.379 |
| 45552 | 0.095 | 51322 | 0.617 | 51542 | 0.261 | 52312 | 0.608 | 52532 | 0.361 | 53252 | 0.305 | 53522 | 0.370 |
| 45553 | 0.061 | 51323 | 0.583 | 51543 | 0.227 | 52313 | 0.574 | 52533 | 0.327 | 53253 | 0.271 | 53523 | 0.336 |
| 45554 | 0.000 | 51324 | 0.522 | 51544 | 0.166 | 52314 | 0.513 | 52534 | 0.267 | 53254 | 0.211 | 53524 | 0.275 |
| 45555 | -0.073 | 51325 | 0.449 | 51545 | 0.093 | 52315 | 0.441 | 52535 | 0.194 | 53255 | 0.138 | 53525 | 0.202 |
| 51111 | 0.689 | 51331 | 0.582 | 51551 | 0.187 | 52321 | 0.601 | 52541 | 0.245 | 53311 | 0.582 | 53531 | 0.336 |
| 51112 | 0.679 | 51332 | 0.573 | 51552 | 0.177 | 52322 | 0.591 | 52542 | 0.235 | 53312 | 0.573 | 53532 | 0.326 |
| 51113 | 0.645 | 51333 | 0.539 | 51553 | 0.143 | 52323 | 0.557 | 52543 | 0.201 | 53313 | 0.539 | 53533 | 0.292 |
| 51114 | 0.584 | 51334 | 0.478 | 51554 | 0.082 | 52324 | 0.496 | 52544 | 0.140 | 53314 | 0.478 | 53534 | 0.231 |
| 51115 | 0.512 | 51335 | 0.405 | 51555 | 0.010 | 52325 | 0.423 | 52545 | 0.068 | 53315 | 0.405 | 53535 | 0.159 |
| 51121 | 0.672 | 51341 | 0.456 | 52111 | 0.663 | 52331 | 0.557 | 52551 | 0.161 | 53321 | 0.565 | 53541 | 0.209 |
| 51122 | 0.662 | 51342 | 0.447 | 52112 | 0.654 | 52332 | 0.547 | 52552 | 0.152 | 53322 | 0.556 | 53542 | 0.200 |
| 51123 | 0.628 | 51343 | 0.413 | 52113 | 0.620 | 52333 | 0.513 | 52553 | 0.118 | 53323 | 0.522 | 53543 | 0.166 |
| 51124 | 0.567 | 51344 | 0.352 | 52114 | 0.559 | 52334 | 0.453 | 52554 | 0.057 | 53324 | 0.461 | 53544 | 0.105 |
| 51125 | 0.495 | 51345 | 0.279 | 52115 | 0.486 | 52335 | 0.380 | 52555 | -0.016 | 53325 | 0.388 | 53545 | 0.032 |
| 51131 | 0.628 | 51351 | 0.373 | 52121 | 0.646 | 52341 | 0.431 | 53111 | 0.628 | 53331 | 0.522 | 53551 | 0.126 |
| 51132 | 0.619 | 51352 | 0.363 | 52122 | 0.637 | 52342 | 0.421 | 53112 | 0.618 | 53332 | 0.512 | 53552 | 0.116 |
| 51133 | 0.584 | 51353 | 0.329 | 52123 | 0.603 | 52343 | 0.387 | 53113 | 0.584 | 53333 | 0.478 | 53553 | 0.082 |
| 51134 | 0.524 | 51354 | 0.268 | 52124 | 0.542 | 52344 | 0.326 | 53114 | 0.524 | 53334 | 0.417 | 53554 | 0.022 |
| 51135 | 0.451 | 51355 | 0.196 | 52125 | 0.469 | 52345 | 0.254 | 53115 | 0.451 | 53335 | 0.345 | 53555 | -0.051 |
| 51141 | 0.502 | 51411 | 0.570 | 52131 | 0.602 | 52351 | 0.347 | 53121 | 0.611 | 53341 | 0.395 | 54111 | 0.572 |
| 51142 | 0.492 | 51412 | 0.561 | 52132 | 0.593 | 52352 | 0.338 | 53122 | 0.601 | 53342 | 0.386 | 54112 | 0.562 |
| 51143 | 0.458 | 51413 | 0.527 | 52133 | 0.559 | 52353 | 0.304 | 53123 | 0.567 | 53343 | 0.352 | 54113 | 0.528 |
| 51144 | 0.397 | 51414 | 0.466 | 52134 | 0.498 | 52354 | 0.243 | 53124 | 0.506 | 53344 | 0.291 | 54114 | 0.468 |
| 51145 | 0.325 | 51415 | 0.393 | 52135 | 0.425 | 52355 | 0.170 | 53125 | 0.434 | 53345 | 0.218 | 54115 | 0.395 |
| 54121 | 0.555 | 54251 | 0.259 | 54431 | 0.393 | 55111 | 0.415 | 55241 | 0.186 | 55421 | 0.280 | 55551 | -0.087 |
| 54122 | 0.545 | 54252 | 0.249 | 54432 | 0.383 | 55112 | 0.406 | 55242 | 0.176 | 55422 | 0.270 | 55552 | -0.096 |
| 54123 | 0.511 | 54253 | 0.215 | 54433 | 0.349 | 55113 | 0.372 | 55243 | 0.142 | 55423 | 0.236 | 55553 | -0.130 |
| 54124 | 0.450 | 54254 | 0.155 | 54434 | 0.289 | 55114 | 0.311 | 55244 | 0.082 | 55424 | 0.176 | 55554 | -0.191 |
| 54125 | 0.378 | 54255 | 0.082 | 54435 | 0.216 | 55115 | 0.238 | 55245 | 0.009 | 55425 | 0.103 | 55555 | -0.264 |
| 54131 | 0.511 | 54311 | 0.526 | 54441 | 0.267 | 55121 | 0.398 | 55251 | 0.102 | 55431 | 0.236 |  |  |
| 54132 | 0.502 | 54312 | 0.517 | 54442 | 0.257 | 55122 | 0.389 | 55252 | 0.093 | 55432 | 0.227 |  |  |
| 54133 | 0.468 | 54313 | 0.483 | 54443 | 0.223 | 55123 | 0.355 | 55253 | 0.059 | 55433 | 0.193 |  |  |
| 54134 | 0.407 | 54314 | 0.422 | 54444 | 0.162 | 55124 | 0.294 | 55254 | -0.002 | 55434 | 0.132 |  |  |
| 54135 | 0.334 | 54315 | 0.349 | 54445 | 0.089 | 55125 | 0.221 | 55255 | -0.075 | 55435 | 0.059 |  |  |
| 54141 | 0.385 | 54321 | 0.509 | 54451 | 0.183 | 55131 | 0.355 | 55311 | 0.370 | 55441 | 0.110 |  |  |
| 54142 | 0.375 | 54322 | 0.500 | 54452 | 0.174 | 55132 | 0.345 | 55312 | 0.360 | 55442 | 0.101 |  |  |
| 54143 | 0.341 | 54323 | 0.466 | 54453 | 0.140 | 55133 | 0.311 | 55313 | 0.326 | 55443 | 0.066 |  |  |
| 54144 | 0.281 | 54324 | 0.405 | 54454 | 0.079 | 55134 | 0.250 | 55314 | 0.266 | 55444 | 0.006 |  |  |
| 54145 | 0.208 | 54325 | 0.332 | 54455 | 0.006 | 55135 | 0.178 | 55315 | 0.193 | 55445 | -0.067 |  |  |
| 54151 | 0.301 | 54331 | 0.466 | 54511 | 0.340 | 55141 | 0.228 | 55321 | 0.353 | 55451 | 0.027 |  |  |
| 54152 | 0.292 | 54332 | 0.456 | 54512 | 0.331 | 55142 | 0.219 | 55322 | 0.343 | 55452 | 0.017 |  |  |
| 54153 | 0.258 | 54333 | 0.422 | 54513 | 0.297 | 55143 | 0.185 | 55323 | 0.309 | 55453 | -0.017 |  |  |
| 54154 | 0.197 | 54334 | 0.361 | 54514 | 0.236 | 55144 | 0.124 | 55324 | 0.248 | 55454 | -0.078 |  |  |
| 54155 | 0.124 | 54335 | 0.288 | 54515 | 0.163 | 55145 | 0.051 | 55325 | 0.176 | 55455 | -0.151 |  |  |
| 54211 | 0.529 | 54341 | 0.339 | 54521 | 0.323 | 55151 | 0.145 | 55331 | 0.309 | 55511 | 0.184 |  |  |
| 54212 | 0.520 | 54342 | 0.330 | 54522 | 0.314 | 55152 | 0.135 | 55332 | 0.300 | 55512 | 0.174 |  |  |
| 54213 | 0.486 | 54343 | 0.296 | 54523 | 0.280 | 55153 | 0.101 | 55333 | 0.266 | 55513 | 0.140 |  |  |
| 54214 | 0.425 | 54344 | 0.235 | 54524 | 0.219 | 55154 | 0.041 | 55334 | 0.205 | 55514 | 0.080 |  |  |
| 54215 | 0.352 | 54345 | 0.162 | 54525 | 0.146 | 55155 | -0.032 | 55335 | 0.132 | 55515 | 0.007 |  |  |
| 54221 | 0.512 | 54351 | 0.256 | 54531 | 0.280 | 55211 | 0.373 | 55341 | 0.183 | 55521 | 0.167 |  |  |
| 54222 | 0.503 | 54352 | 0.246 | 54532 | 0.270 | 55212 | 0.363 | 55342 | 0.173 | 55522 | 0.157 |  |  |
| 54223 | 0.469 | 54353 | 0.212 | 54533 | 0.236 | 55213 | 0.329 | 55343 | 0.139 | 55523 | 0.123 |  |  |
| 54224 | 0.408 | 54354 | 0.152 | 54534 | 0.175 | 55214 | 0.269 | 55344 | 0.079 | 55524 | 0.062 |  |  |
| 54225 | 0.335 | 54355 | 0.079 | 54535 | 0.103 | 55215 | 0.196 | 55345 | 0.006 | 55525 | -0.010 |  |  |
| 54231 | 0.469 | 54411 | 0.454 | 54541 | 0.153 | 55221 | 0.356 | 55351 | 0.099 | 55531 | 0.123 |  |  |
| 54232 | 0.459 | 54412 | 0.444 | 54542 | 0.144 | 55222 | 0.346 | 55352 | 0.090 | 55532 | 0.114 |  |  |
| 54233 | 0.425 | 54413 | 0.410 | 54543 | 0.110 | 55223 | 0.312 | 55353 | 0.056 | 55533 | 0.080 |  |  |
| 54234 | 0.364 | 54414 | 0.349 | 54544 | 0.049 | 55224 | 0.252 | 55354 | -0.005 | 55534 | 0.019 |  |  |
| 54235 | 0.292 | 54415 | 0.276 | 54545 | -0.024 | 55225 | 0.179 | 55355 | -0.078 | 55535 | -0.054 |  |  |
| 54241 | 0.342 | 54421 | 0.436 | 54551 | 0.070 | 55231 | 0.312 | 55411 | 0.297 | 55541 | -0.003 |  |  |
| 54242 | 0.333 | 54422 | 0.427 | 54552 | 0.060 | 55232 | 0.303 | 55412 | 0.288 | 55542 | -0.013 |  |  |
| 54243 | 0.299 | 54423 | 0.393 | 54553 | 0.026 | 55233 | 0.269 | 55413 | 0.254 | 55543 | -0.047 |  |  |
| 54244 | 0.238 | 54424 | 0.332 | 54554 | -0.034 | 55234 | 0.208 | 55414 | 0.193 | 55544 | -0.107 |  |  |
| 54245 | 0.165 | 54425 | 0.259 | 54555 | -0.107 | 55235 | 0.135 | 55415 | 0.120 | 55545 | -0.180 |  |  |
